# Supplementary material for: Maternal Fever and Reduced Fetal Movement as Predictive Risk Factors for Adverse Neonatal Outcome in Cases of Congenital SARS-CoV-2 Infection: A Meta-Analysis of Individual Participant Data from Case Reports and Case Series
Source: MDPI journal article supplement (doi:10.3390/v15071615), 2023-07-24
Supplement: s1 [file s1]

## Quality Assessment and Summary of Key Characteristics of Included Studies

**Table S1.** Case Reports/Case Series Studies assessed using the Murad Tool Scoring Criteria [1]. The study is classified as "good quality" – score 4, "fair quality" – score 3 and "poor quality" score between 1-2

| Author                        | Country     | Number of eligible newborns | Quality Assessment Score |
|-------------------------------|-------------|-----------------------------|--------------------------|
| Abadía-Cuchí <i>et al</i> [2] | Spain       | 1                           | 2                        |
| Alzamora MC <i>et al</i> [3]  | Peru        | 1                           | 4                        |
| Babal <i>et al</i> [4]        | Slovakia    | 1                           | 2                        |
| Boncompagni <i>et al</i> [5]  | Italy       | 1                           | 3                        |
| Bouachba[6]                   | France      | 2                           | 4                        |
| Buonsenso D <i>et al</i> [7]  | Italy       | 1                           | 3                        |
| Bullok <i>et al</i> [8]       | USA         | 1                           | 4                        |
| Carvalho <i>et al</i> [9]     | Brazil      | 2                           | 4                        |
| Choobdar <i>et al</i> [10]    | Iran        | 1                           | 3                        |
| Correia <i>et al</i> [11]     | Portugal    | 1                           | 2                        |
| Daza[12]                      | Columbia    | 1                           | 4                        |
| Disse <i>et al</i> [13]       | Germany     | 2                           | 3                        |
| Dong <i>et al</i> [14]        | China       | 1                           | 4                        |
| Enache <i>et al</i> [15]      | Romania     | 1                           | 3                        |
| Eich[16]                      | Germany     | 1                           | 4                        |
| Ergon <i>et al</i> [17]       | Turkey      | 1                           | 3                        |
| Facchetti <i>et al</i> [18]   | Italy       | 1                           | 2                        |
| Farhadi <i>et al</i> [19]     | Iran        | 1                           | 4                        |
| Favre <i>et al</i> [20]       | Switzerland | 1                           | 3                        |
| Fitzgerald <i>et al</i> [21]  | Ireland     | 5                           | 3                        |
| Fusco <i>et al</i> [22]       | Brazil      | 3                           | 4                        |
| Gant <i>et al</i> [23]        | USA         | 1                           | 4                        |
| Garcia-Ruiz <i>et al</i> [24] | Spain       | 1                           | 2                        |
| Guan[25]                      | USA         | 1                           | 4                        |
| Karade <i>et al</i> [26]      | India       | 1                           | 3                        |
| Kirtsman <i>et al</i> [27]    | Canada      | 1                           | 3                        |
| Kohorn <i>et al</i> [28]      | USA         | 1                           | 3                        |
| Lesieur <i>et al</i> [29]     | France      | 1                           | 3                        |

|                                  |              |   |   |
|----------------------------------|--------------|---|---|
| Lorenz <i>et al</i> [30]         | Germany      | 1 | 3 |
| Marinho <i>et al</i> [31]        | Brazil       | 1 | 4 |
| Marton <i>et al</i> [32]         | UK           | 1 | 2 |
| Marzollo <i>et al</i> [33]       | Italy        | 1 | 3 |
| Morales <i>et al</i> [34]        | Mexico       | 1 | 3 |
| Min Yi <i>et al</i> [35]         | Singapore    | 1 | 2 |
| NG David <i>et al</i> [36]       | Malaysia     | 1 | 3 |
| Parsa <i>et al</i> [37]          | Iran         | 1 | 4 |
| Popescu <i>et al</i> [38]        | Romania      | 1 | 2 |
| Pulinx <i>et al</i> [39]         | Belgium      | 2 | 2 |
| Reagan-Steiner <i>et al</i> [40] | USA          | 1 | 3 |
| Rebello <i>et al</i> [41]        | Brazil       | 1 | 3 |
| Richtmann <i>et al</i> [42]      | Brazil       | 1 | 4 |
| Rodrigues <i>et al</i> [43]      | Portugal     | 1 | 2 |
| Sagara <i>et al</i> [44]         | Japan        | 1 | 4 |
| Schwartz[45]                     | Georgia      | 2 | 2 |
| Sessa <i>et al</i> [46]          | Italy        | 2 | 3 |
| Shaiba <i>et al</i> [47]         | Saudi-Arabia | 1 | 2 |
| Shen <i>et al</i> [48]           | USA          | 1 | 2 |
| Shook <i>et al</i> [49]          | USA          | 2 | 4 |
| Sukhikh <i>et al</i> [50]        | Russia       | 1 | 3 |
| Vivanti <i>et al</i> [51]        | France       | 5 | 2 |
| Vivanti <i>et al</i> [52]        | France       | 1 | 4 |
| Zaigham <i>et al</i> [53]        | Sweden       | 9 | 3 |
| Zamaniyan <i>et al</i> [54]      | Iran         | 1 | 4 |
| Zhang <i>et al</i> [55]          | USA          | 1 | 2 |
| Zinserling <i>et al</i> [56]     | Russia       | 1 | 4 |

Table S2. Scoring Criteria for the Murad Tool

|                      |                                                                                                                                                                                                                                                                         |
|----------------------|-------------------------------------------------------------------------------------------------------------------------------------------------------------------------------------------------------------------------------------------------------------------------|
| <b>Selection</b>     | <ul style="list-style-type: none"> <li>• Were the cases presented from a particular study period?</li> </ul>                                                                                                                                                            |
| <b>Ascertainment</b> | <ul style="list-style-type: none"> <li>• Were the cases positive for COVID-19 according to the accepted criteria?</li> <li>• Was the neonates' clinical status reported?</li> </ul>                                                                                     |
| <b>Causality</b>     | <ul style="list-style-type: none"> <li>• Have alternative causes for the presence of symptoms besides COVID-19 infection been ruled out?</li> <li>• Was the duration of the follow-up sufficient for outcomes to occur, such as neonatal discharge or death?</li> </ul> |

|                  |                                                                                                                                                                                                      |
|------------------|------------------------------------------------------------------------------------------------------------------------------------------------------------------------------------------------------|
| <b>Reporting</b> | <ul style="list-style-type: none"> <li>Was the case described sufficiently for other researchers to replicate the study or for practitioners to draw inferences about their own practice?</li> </ul> |
|------------------|------------------------------------------------------------------------------------------------------------------------------------------------------------------------------------------------------|

**Table S3.** Studies were assessed based on Newcastle-Ottawa Scale. A study with a score of 6 or more is classified as high quality, 4-5 as medium quality, and less than 4 as low quality, using the Newcastle-Ottawa Scale[57].

| <i>Study</i>                      | <b>Country</b> | <b>Cohort size</b> | <b>Number of cases with confirmed vertical transmission</b> | <b>Quality Assessment Score</b> |
|-----------------------------------|----------------|--------------------|-------------------------------------------------------------|---------------------------------|
| <i>Argueta et al</i> [58]         | USA            | 54                 | 1                                                           | 5                               |
| <i>Fenizia et al</i> [59]         | Italy          | 31                 | 1                                                           | 5                               |
| <i>Garrido-Pontnou et al</i> [60] | Spain          | 198                | 4                                                           | 2                               |

**Table S4.** Scoring Criteria for the Newcastle-Ottawa Scale

|                      |                                                                                                                                                                                                                                                                                                                                        |
|----------------------|----------------------------------------------------------------------------------------------------------------------------------------------------------------------------------------------------------------------------------------------------------------------------------------------------------------------------------------|
| <b>Selection</b>     | <ul style="list-style-type: none"> <li>Were the cases presented representative of the average in the target population?</li> <li>Were there cases with negative COVID-19 test?</li> <li>Were the cases taken from medical records?</li> <li>Was the subject of vertical transmissions followed in the study from beginning?</li> </ul> |
| <b>Comparability</b> | <ul style="list-style-type: none"> <li>Were the cases of interest compared to other groups based on the study design or analysis?</li> </ul>                                                                                                                                                                                           |
| <b>Outcome</b>       | <ul style="list-style-type: none"> <li>Was there sufficient clinical data on the neonates?</li> <li>Were the confirmed cases followed up long enough for outcome to occur?</li> <li>Was there a complete follow-up of the confirmed cases?</li> </ul>                                                                                  |

## Reference

1. M. H. Murad, S. Sultan, S. Haffar, and F. Bazerbachi, "Methodological quality and synthesis of case series and case reports," *BMJ Evid Based Med*, vol. 23, no. 2, pp. 60–63, Apr. **2018**, doi: 10.1136/bmjebm-2017-110853.
2. N. Abadía-Cuchí, N.; Ruiz-Martínez, S.; Fabre, M.; Mateo, P.; Remacha Sienes, M.; Ventura Faci, P.; Bueno Sancho, J.; Paules, C, "SARS-CoV-2 congenital infection and pre-eclampsia-like syndrome in dichorionic twins: A case report and review of the literature," *Int J Gynaecol Obstet*, vol. 154, no. 2, pp. 370–372, Aug. **2021**, doi: 10.1002/ijgo.13749.
3. M. C. Alzamora, T. Paredes, D. Caceres, C. M. Webb, L. M. Valdez, and M. La Rosa, "Severe COVID-19 during Pregnancy and Possible Vertical Transmission," *Am J Perinatol*, vol. 37, no. 8, pp. 861–865, Jun. **2020**, doi: 10.1055/s-0040-1710050.
4. Babal, P.; Krivosikova, L.; Sarvaicova, L.; Deckov, I.; Szemes, T.; Sedlackova, T.; Palkovic, M.; Kalinakova, A.; Janega, P, "Intrauterine Fetal Demise After Uncomplicated COVID-19: What Can We Learn from the Case?," *Viruses*, vol. 13, no. 12, p. 2545, Dec. **2021**, doi: 10.3390/v13122545.

5. Boncompagni, A.; De Agostini, M.; Lugli, L.; Ternelli, G.; Colonna, V.; Biagioni, E.; Bonasoni, M.P.; Salviato, T.; Gabrielli, L.; Falconi, M.; et al, "Unexpected Vertical Transmission of SARS-CoV-2: Discordant Clinical Course and Transmission from Mother to Newborn," *Microorganisms*, vol. 10, no. 9, p. 1718, Aug. **2022**, doi: 10.3390/microorganisms10091718.
6. A. Bouachba *et al.*, "Placental lesions and SARS-Cov-2 infection: Diffuse placenta damage associated to poor fetal outcome," *Placenta*, vol. 112, pp. 97–104, Sep. **2021**, doi: 10.1016/j.placenta.2021.07.288.
7. Buonsenso, D.; Costa, S.; Sanguinetti, M.; Cattani, P.; Posteraro, B.; Marchetti, S.; Carducci, B.; Lanzone, A.; Tamburrini, E.; Vento, G.; Valentini, P, "Neonatal Late Onset Infection with Severe Acute Respiratory Syndrome Coronavirus 2," *Am J Perinatol*, vol. 37, no. 8, pp. 869–872, Jun. **2020**, doi: 10.1055/s-0040-1710541.
8. Bullock, H. A.; Fuchs, E.; Martines, R. B.; Lush, M.; Bollweg, B.; Rutan, A.; Nelson, A.; Brisso, M.; Owusu-Ansah, A.; Sitzman, C, "Probable vertical transmission of Alpha variant of concern (B.1.1.7) with evidence of SARS-CoV-2 infection in the syncytiotrophoblast, a case report," *Front Med (Lausanne)*, vol. 9, p. 1099408, Jan. **2023**, doi: 10.3389/fmed.2022.1099408.
9. Ferreira, M.D.F.C.; Pavon, J.A.R.; Napoleão, A.C.B.; Figueiredo, G.M.D.P.; Florêncio, P.C.B.; Arantes, R.B.d.S.; Rizzo, P.S.; Carmo, M.A.M.V.; Nakazato, L.; Dutra, V.; et al., "Clinical and genomic data of sars-cov-2 detected in maternal-fetal interface during the first wave of infection in Brazil," *Microbes Infect*, vol. 24, no. 4, p. 104949, Jun. **2022**, doi: 10.1016/j.micinf.2022.104949.
10. Choobdar, F.A.; Ghassemzadeh, M.; Attarian, M.; Abbariki, E.; Nateghian, A.; Ghanbari, B.; Hamzehi, S.S.; Hashemi, M.R.; Azarbin, Z., "Transplacental Transmission of SARS-CoV-2 Infection: A Case Report from Iran," *Arch Pediatr Infect Dis*, vol. 9, no. 2, Art. no. 2, **2021**, doi: 10.5812/pedinfect.108582.
11. Correia, C.R.; Marçal, M.; Vieira, F.; Santos, E.; Novais, C.; Maria, A.T.; Malveiro, D.; Prior, A.R.; Aguiar, M.; Salazar, A.; et al., "Congenital SARS-CoV-2 Infection in a Neonate With Severe Acute Respiratory Syndrome," *Pediatr Infect Dis J*, vol. 39, no. 12, pp. e439–e443, Dec. **2020**, doi: 10.1097/INF.0000000000002941.
12. Daza, M.; Corchuelo, S.; Osorio, J.; Alberto Gómez, L.; Parra, E.; Alarcón, Á.; Mercado, M., "Fetal demise and SARS-CoV-2 infection during pregnancy: Histopathological and immunohistochemical findings of three cases referred to the Colombian National Institute of Health," *Clinical Infection in Practice*, vol. 17, p. 100219, Jan. **2023**, doi: 10.1016/j.clinpr.2023.100219.
13. Disse, S.C.; Manuylova, T.; Adam, K.; Lechler, A.; Zant, R.; Klingel, K.; Aepinus, C.; Finkenzeller, T.; Wellmann, S.; Schneble, F., "COVID-19 in 28-Week Triplets Caused by Intrauterine Transmission of SARS-CoV-2-Case Report," *Front Pediatr*, vol. 9, p. 812057, **2021**, doi: 10.3389/fped.2021.812057.
14. Dong, L.; Tian, J.; He, S.; Zhu, C.; Wang, J.; Liu, C.; Yang, J., "Possible Vertical Transmission of SARS-CoV-2 From an Infected Mother to Her Newborn," *JAMA*, vol. 323, no. 18, pp. 1846–1848, May **2020**, doi: 10.1001/jama.2020.4621.
15. Enache, A.; Ciocan, V.; Muresan, C.O.; Cut, T.G.; Novacescu, D.; Paul, C.; Andreescu, N.; Mihailescu, A.; Raica, M.; Dumache, R., "Postmortem Documentation of SARS-CoV-2 in Utero and Postpartum Transmission, through Amniotic Fluid, Placental, and Pulmonary Tissue RT-PCR," *Applied Sciences*, vol. 11, no. 20, Art. no. 20, Jan. **2021**, doi: 10.3390/app11209505.
16. Kienast, P.; Prayer, D.; Binder, J.; Prayer, F.; Dekan, S.; Langthaler, E.; Sigl, B.; Eichinger, S.; Perkmann-Nagele, N.; Stuempflen, I. et al., "SARS-CoV-2 variant-related abnormalities detected by prenatal MRI: a prospective case-control study," *The Lancet Regional Health – Europe*, vol. 0, no. 0, Jan. **2023**, doi: 10.1016/j.lanepe.2023.100587.
17. Ergon, E.Y.; Akbay, S.; Aytemiz, G.; Çelik, E.C.A.; Çalışkan Polat, A.; Umit, Z.; Paytoncu, S., "A novel case of neonatal acute respiratory distress syndrome with SARS-CoV-2 infection: potential perinatal transmission," *Arch Argent Pediatr*, vol. 119, no. 5, pp. e531–e535, Oct. 2021, doi: 10.5546/aap.2021.eng.e531.
18. Facchetti, F.; Bugatti, M.; Drera, E.; Tripodo, C.; Sartori, E.; Cancila, V.; Papaccio, M.; Castellani, R.; Casola, S.; Boniotti, M.B.; et al., "SARS-CoV2 vertical transmission with adverse effects on the newborn revealed through integrated immunohistochemical, electron microscopy and molecular analyses of Placenta," *EBioMedicine*, vol. 59, p. 102951, Sep. 2020, doi: 10.1016/j.ebiom.2020.102951.
19. Farhadi, R.; Mehrpisheh, S.; Ghaffari, V.; Haghshenas, M.; Ebadi, A., "Clinical course, radiological findings and late outcome in preterm infant with suspected vertical transmission born to a mother with severe COVID-19 pneumonia: a case report," *J Med Case Rep*, vol. 15, no. 1, p. 213, Apr. 2021, doi: 10.1186/s13256-021-02835-0.

20. Favre, G.; Mazzetti, S.; Gengler, C.; Bertelli, C.; Schneider, J.; Laubscher, B.; Capoccia, R.; Pakniyat, F.; Ben Jazia, I.; Eggel-Hort, B.; et al., "Decreased Fetal Movements: A Sign of Placental SARS-CoV-2 Infection with Perinatal Brain Injury," *Viruses*, vol. 13, no. 12, p. 2517, Dec. 2021, doi: 10.3390/v13122517.
21. Fitzgerald, B.; O'Donoghue, K.; McEntagart, N.; Gillan, J.E.; Kelehan, P.; O'Leary, J.; Downey, P.; Dean, J.; De Gascun, C.F. B., "Fetal Deaths in Ireland Due to SARS-CoV-2 Placentitis Caused by SARS-CoV-2 Alpha," *Arch Pathol Lab Med*, vol. 146, no. 5, pp. 529–537, May 2022, doi: 10.5858/arpa.2021-0586-SA.
22. Fusco, M.A.; Mantini, V.; de Souza Salmont Júnior, J.; de Carvalho Gomes, R.G.; de Oliveira Lima, A.R.; de Oliveira Clarim, H.L.; Ferreira, E.C.; de Abreu Almeida, S.S.; Salmont, C.G.; de Sousa Rizzo-Valente, V.; et al. "Assessment of SARS-CoV-2 Vertical Transmission through Nested RT-PCR Testing of Neonatal Samples: Three Case Reports," *Journal of Pediatrics, Perinatology and Child Health*, vol. 6, no. 3, pp. 370–376, Sep. 2022.
23. T. F. Gant, T. P. Villegas, J. Summerall-Smith, and B. Watkins, "Intrauterine fetal demise as a result of maternal COVID-19 infection in the third trimester of pregnancy: A case report," *Int J Surg Case Rep*, vol. 98, p. 107492, Sep. 2022, doi: 10.1016/j.ijscr.2022.107492.
24. Garcia-Ruiz, I.; Sulleiro, E.; Serrano, B.; Fernandez-Buhigas, I.; Rodriguez-Gomez, L.; Sanchez-Nieves Fernandez, D.; Anton-Pagarolas, A.; Esperalba-Esquerria, J.; Frick, M. A.; Camba, F.; et al. "Congenital infection of SARS-CoV-2 in live-born neonates: a population-based descriptive study," *Clin Microbiol Infect*, vol. 27, no. 10, p. 1521.e1-1521.e5, Oct. 2021, doi: 10.1016/j.cmi.2021.06.016
25. Guan, M.; Johannesen, E.; Tang, C. Y.; Hsu, A. L.; Barnes, C. L.; Burnam, M.; McElroy, J. A.; Wan, X.-F., "Intrauterine Fetal Demise in the Third Trimester of Pregnancy Associated With Mild Infection With the SARS-CoV-2 Delta Variant Without Protection From Vaccination," *J Infect Dis*, vol. 225, no. 5, pp. 748–753, Mar. 2022, doi: 10.1093/infdis/jiac007.
26. S. Karade, A. K. Vishal, S. Sen, N. Bewal, and R. M. Gupta, "Probable vertical transmission of severe acute respiratory syndrome coronavirus 2 infection from mother to neonate," *Med J Armed Forces India*, vol. 77, no. Suppl 2, pp. S490–S493, Jul. 2021, doi: 10.1016/j.mjafi.2020.11.026.
27. Kirtsman, M.; Diambomba, Y.; Poutanen, S.M.; Malinowski, A.K.; Vlachodimitropoulou, E.; Parks, W.T.; Erdman, L.; Morris, S.K.; Shah, P.S., "Probable congenital SARS-CoV-2 infection in a neonate born to a woman with active SARS-CoV-2 infection," *CMAJ*, vol. 192, no. 24, pp. E647–E650, Jun. 2020, doi: 10.1503/cmaj.200821.
28. Von Kohorn, I.; Stein, S.R.; Shikani, B.T.; Ramos-Benitez, M.J.; Vannella, K.M.; Hewitt, S.M.; E Kleiner, D.; Alejo, J.C.; Burbelo, P.; I Cohen, J. et al., "In Utero Severe Acute Respiratory Syndrome Coronavirus 2 Infection," *J Pediatric Infect Dis Soc*, vol. 9, no. 6, pp. 769–771, Dec. 2020, doi: 10.1093/jpids/piaa127.
29. Lesieur, E.; Torrents, J.; Fina, F.; Zandotti, C.; Blanc, J.; Collardeau-Frachon, S.; Gazin, C.; Sirgant, D.; Mezouar, S.; Otmani Idrissi, M.; et al., "Congenital Infection of Severe Acute Respiratory Syndrome Coronavirus 2 With Intrauterine Fetal Death: A Clinicopathological Study With Molecular Analysis," *Clin Infect Dis*, vol. 75, no. 1, pp. e1092–e1100, Aug. 2022, doi: 10.1093/cid/ciab840.
30. Lorenz, N.; Treptow, A.; Schmidt, S.; Hofmann, R.; Raumer-Engler, M.; Heubner, G.; Gröber, K., "Neonatal Early-Onset Infection With SARS-CoV-2 in a Newborn Presenting With Encephalitic Symptoms," *Pediatr Infect Dis J*, vol. 39, no. 8, p. e212, Aug. 2020, doi: 10.1097/INF.0000000000002735.
31. Marinho, P.S.; da Cunha, A.J.L.A.; Chimelli, L.; Avvad-Portari, E.; Andreiuolo, F.D.M.; de Oliveira-Szejnfeld, P.S.; Mendes, M.A.; Gomes, I.C.; Souza, L.R.Q.; Guimarães, M.Z.; et al., "Case Report: SARS-CoV-2 Mother-to-Child Transmission and Fetal Death Associated With Severe Placental Thromboembolism," *Front Med (Lausanne)*, vol. 8, p. 677001, 2021, doi: 10.3389/fmed.2021.677001.
32. T. Marton, B. Hargitai, K. Hunter, M. Pugh, and P. Murray, "Massive Perivillous Fibrin Deposition and Chronic Histiocytic Intervillositis a Complication of SARS-CoV-2 Infection," *Pediatr Dev Pathol*, vol. 24, no. 5, pp. 450–454, Sep. 2021, doi: 10.1177/10935266211020723.
33. Marzollo, R.; Aversa, S.; Prefumo, F.; Sacconi, B.; Perez, C.R.; Sartori, E.; Motta, M., "Possible Coronavirus Disease 2019 Pandemic and Pregnancy: Vertical Transmission Is Not Excluded," *Pediatr Infect Dis J*, vol. 39, no. 9, pp. e261–e262, Sep. 2020, doi: 10.1097/INF.0000000000002816.
34. Morales, H. S. G.; Cortés, D. V.; Hernández, H. S.; Guiot, M. L.; Torres, G. C. R.; Camacho, F. M. R.; Montoya, G. A.; Maldonado, B. F.; Bárcenas, J. G.; López, G. G. P., "Vertical transmission: evidence of COVID-19 in a twin pregnancy," *JBRA Assist Reprod*, vol. 26, no. 1, pp. 153–157, 2022, doi: 10.5935/1518-0557.20210058.
35. O. M. Y. Leow, R. Aoyama, and S. M. Chan, "The evolution of severity of paediatric COVID-19 in Singapore: Vertical transmission and multisystem inflammatory syndrome in children," *Ann Acad Med Singap*, vol. 51, no. 2, pp. 115–118, Feb. 2022, doi: 10.47102/annals-acadmedsg.2021426.

36. D. C. Ng, L. Chin, P. P. L. Choo, and U. Paramasivam, "COVID-19 in a premature infant," *BMJ Case Rep*, vol. 14, no. 5, p. e243783, May 2021, doi: 10.1136/bcr-2021-243783.
37. Y. Parsa, N. Shokri, T. Jahedbozorgan, Z. Naeiji, S. Zadehmodares, and A. Moridi, "Possible Vertical Transmission of COVID-19 to the Newborn; a Case Report," *Arch Acad Emerg Med*, vol. 9, no. 1, p. e5, 2021.
38. Popescu, D.E.; Cioca, A.; Muresan, C.; Navolan, D.; Gui, A.; Pop, O.; Marcovici, T.; Ilie, C.; Craina, M.; Boia, M.A., "A Case of COVID-19 Pregnancy Complicated with Hydrops Fetalis and Intrauterine Death," *Medicina (Kaunas)*, vol. 57, no. 7, p. 667, Jun. 2021, doi: 10.3390/medicina57070667.
39. Pulinx, B.; Kieffer, D.; Michiels, I.; Petermans, S.; Strybol, D.; Delvaux, S.; Baldewijns, M.; Raymaekers, M.; Cartuyvels, R.; Maurissen, W., "Vertical transmission of SARS-CoV-2 infection and preterm birth," *Eur J Clin Microbiol Infect Dis*, vol. 39, no. 12, pp. 2441–2445, 2020, doi: 10.1007/s10096-020-03964-y.
40. Reagan-Steiner, S.; Bhatnagar, J.; Martines, R.B.; Milligan, N.S.; Gisondo, C.; Williams, F.B.; Lee, E.; Estetter, L.; Bullock, H.; Goldsmith, C.S.; et al., "Detection of SARS-CoV-2 in Neonatal Autopsy Tissues and Placenta," *Emerg Infect Dis*, vol. 28, no. 3, pp. 510–517, Mar. 2022, doi: 10.3201/eid2803.211735.
41. C. M. Rebello, L. P. Fascina, G. Annicchino, J. R. R. Pinho, R. de A. M. Yoshida, and R. S. B. Zacharias, "Vertical transmission of SARS-CoV-2 from infected pregnant mother to the neonate detected by cord blood real-time polymerase chain reaction (RT-PCR)," *Pediatr Res*, vol. 89, no. 7, pp. 1592–1593, May 2021, doi: 10.1038/s41390-020-01193-9.
42. Richtmann, R.; Torloni, M.R.; Oyamada Otani, A.R.; Levi, J.E.; Crema Tobará, M.; de Almeida Silva, C.; Dias, L.; Miglioli-Galvão, L.; Martins Silva, P.; Macoto Kondo, M. et al., "Fetal deaths in pregnancies with SARS-CoV-2 infection in Brazil: A case series," *Case Rep Womens Health*, vol. 27, p. e00243, Jul. 2020, doi: 10.1016/j.crwh.2020.e00243.
43. M. L. Rodrigues, G. Gasparinho, F. Sepúlveda, and T. Matos, "Signs suggestive of congenital SARS-CoV-2 infection with intrauterine fetal death: A case report," *Eur J Obstet Gynecol Reprod Biol*, vol. 256, pp. 508–509, Jan. 2021, doi: 10.1016/j.ejogrb.2020.11.042.
44. A. Sagara, M. Yamaguchi, Y. Mikami, T. Motohara, T. Ohba, and E. Kondoh, "Maternal thrombocytopenia precedes fetal death associated with COVID-19," *J Obstet Gynaecol Res*, vol. 48, no. 6, pp. 1475–1479, Jun. 2022, doi: 10.1111/jog.15223.
45. Schwartz, D. A.; Baldewijns, M.; Benachi, A.; Bugatti, M.; Collins, R. R. J.; De Luca, D.; Facchetti, F.; Linn, R. L.; Marcelis, L.; Morotti, D.; et al., "Chronic Histiocytic Intervillositis With Trophoblast Necrosis Is a Risk Factor Associated With Placental Infection From Coronavirus Disease 2019 (COVID-19) and Intrauterine Maternal-Fetal Severe Acute Respiratory Syndrome Coronavirus 2 (SARS-CoV-2) Transmission in Live-Born and Stillborn Infants," *Arch Pathol Lab Med*, vol. 145, no. 5, pp. 517–528, May 2021, doi: 10.5858/arpa.2020-0771-SA.
46. Sessa, R.; Masciullo, L.; Filardo, S.; Di Pietro, M.; Brandolino, G.; Brunelli, R.; Galoppi, P.; Terrin, G.; Viscardi, M.F.; Anastasi, E.; et al., "SARS-CoV-2 vertical transmission in a twin-pregnant woman: a case report," *Int J Infect Dis*, pp. S1201-9712(22)00558–6, Oct. 2022, doi: 10.1016/j.ijid.2022.10.019.
47. Shaiba, L. A.; Hadid, A.; Altirkawi, K. A.; Bakheet, H. M.; Alherz, A. M.; Hussain, S. A.; Sobaih, B. H.; Alnemri, A. M.; Almaghrabi, R.; et al., "Case Report: Neonatal Multi-System Inflammatory Syndrome Associated With SARS-CoV-2 Exposure in Two Cases From Saudi Arabia," *Front Pediatr*, vol. 9, p. 652857, 2021, doi: 10.3389/fped.2021.652857.
48. Shen, W.-B.; Turan, S.; Wang, B.; Cojocaru, L.; Harman, C.; Logue, J.; Reece, E.A.; Frieman, M.B.; Yang, P., "A SARS-CoV-2 Delta Variant Case Manifesting as Extensive Placental Infection and Fetal Transmission," *Gynecol Obstet Invest*, vol. 87, no. 2, pp. 165–172, 2022, doi: 10.1159/000524905.
49. Shook, L. L.; Brigida, S.; Regan, J.; Flynn, J. P.; Mohammadi, A.; Etemad, B.; Siegel, M. R.; Clapp, M. A.; Li, J. Z.; Roberts, D. J.; Edlow, A. G., "SARS-CoV-2 Placentitis Associated With B.1.617.2 (Delta) Variant and Fetal Distress or Demise," *J Infect Dis*, vol. 225, no. 5, pp. 754–758, Jan. 2022, doi: 10.1093/infdis/jiac008.
50. Sukhikh, G.; Petrova, U.; Prikhodko, A.; Starodubtseva, N.; Chingin, K.; Chen, H.; Bugrova, A.; Kononikhin, A.; Bourmenskaya, O.; Brzhozovskiy, A.; et al., "Vertical Transmission of SARS-CoV-2 in Second Trimester Associated with Severe Neonatal Pathology," *Viruses*, vol. 13, no. 3, p. 447, Mar. 2021, doi: 10.3390/v13030447.
51. Vivanti, A.J.; Vauloup-Fellous, C.; Escourrou, G.; Rosenblatt, J.; Jouannic, J.M.; Laurent-Bellue, A.; De Luca, D. "Factors associated with SARS-CoV-2 transplacental transmission," *Am J Obstet Gynecol*, vol. 227, no. 3, pp. 541–543.e11, Sep. 2022, doi: 10.1016/j.ajog.2022.05.015.

52. Vivanti, A.J.; Vauloup-Fellous, C.; Prevot, S.; Zupan, V.; Suffee, C.; Do Cao, J.; Benachi, A.; De Luca, D. "Transplacental transmission of SARS-CoV-2 infection," *Nat Commun*, vol. 11, no. 1, p. 3572, Jul. **2020**, doi: 10.1038/s41467-020-17436-6.
53. Zaigham, M.; Gisselsson, D.; Sand, A.; Wikström, A.-K.; von Wowern, E.; Schwartz, D. A.; Iorizzo, L.; Nelander, M.; Blomberg, M.; Papadogiannakis, N.; et al., "Clinical-pathological features in placentas of pregnancies with SARS-CoV-2 infection and adverse outcome: case series with and without congenital transmission," *BJOG*, vol. 129, no. 8, pp. 1361–1374, Jul. **2022**, doi: 10.1111/1471-0528.17132.
54. M. Zamaniyan, A. Ebadi, S. Aghajani, Z. Rahmani, M. Haghshenas, and S. Azizi, "Preterm delivery, maternal death, and vertical transmission in a pregnant woman with COVID-19 infection," *Prenat Diagn*, vol. 40, no. 13, pp. 1759–1761, Dec. **2020**, doi: 10.1002/pd.5713.
55. P. Zhang, C. Salafia, T. Heyman, C. Salafia, S. Lederman, and B. Dygulska, "Detection of severe acute respiratory syndrome coronavirus 2 in placentas with pathology and vertical transmission," *Am J Obstet Gynecol MFM*, vol. 2, no. 4, p. 100197, Nov. **2020**, doi: 10.1016/j.ajogmf.2020.100197.
56. Zinserling, V. A.; Bornstein, S. R.; Narkevich, T. A.; Sukhanova, Y. V.; Semenova, N. Yu.; Vashukova, M. A.; Steenblock, C., "Stillborn child with diffuse SARS-CoV-2 viral infection of multiple organs," *IDCases*, vol. 26, p. e01328, Nov. **2021**, doi: 10.1016/j.idcr.2021.e01328.
57. C. K.-L. Lo, D. Mertz, and M. Loeb, "Newcastle-Ottawa Scale: comparing reviewers' to authors' assessments," *BMC Med Res Methodol*, vol. 14, p. 45, Apr. **2014**, doi: 10.1186/1471-2288-14-45.
58. Argueta, L. B.; Lacko, L. A.; Bram, Y.; Tada, T.; Carrau, L.; Rendeiro, A. F.; Zhang, T.; Uhl, S.; Lubor, B. C.; Chandar, V.; Gil, C.; Zhang, W., "Inflammatory responses in the placenta upon SARS-CoV-2 infection late in pregnancy," *iScience*, vol. 25, no. 5, p. 104223, May **2022**, doi: 10.1016/j.isci.2022.104223.
59. Fenizia, C.; Biasin, M.; Cetin, I.; Vergani, P.; Mileto, D.; Spinillo, A.; Gismondo, M.R.; Perotti, F.; Callegari, C.; Mancon, A.; et al., "Analysis of SARS-CoV-2 vertical transmission during pregnancy," *Nat Commun*, vol. 11, no. 1, p. 5128, Oct. **2020**, doi: 10.1038/s41467-020-18933-4.
60. Garrido-Pontnou, M.; Navarro, A.; Camacho, J.; Crispi, F.; Alguacil-Guillén, M.; Moreno-Baró, A.; Hernandez-Losa, J.; Sesé, M.; Ramón y Cajal, S.; et al., "Diffuse trophoblast damage is the hallmark of SARS-CoV-2-associated fetal demise," *Mod Pathol*, vol. 34, no. 9, Art. no. 9, Sep. **2021**, doi: 10.1038/s41379-021-00827-5.
